# Supplementary material for: Identification and characterization of regulatory network components for anthocyanin synthesis in barley aleurone
Source: PubMed Central journal article supplement (PMC5688479; doi:10.1186/s12870-017-1122-3), 2017-11-14
Supplement: 12870_2017_1122_MOESM1_ESM.pdf [file 12870_2017_1122_MOESM1_ESM.pdf]

**Additional file 1. The presence of the *HvMyc2-BA* allele in barley Bowman NILs (1-2), parents of the mapping population used (3-4), recombinant DH lines of this population (5-96), accessions and cultivars from IPK Genbank (97-98) and ICG collection GenAgro (99-107).**

| No  | Genotype                     | Grain color | The presence of the <i>HvMyc2-BA</i> allele determined by the use of allele specific DNA-marker |
|-----|------------------------------|-------------|-------------------------------------------------------------------------------------------------|
| 1.  | Bowman, BW (NGB22812)        | white       | +                                                                                               |
| 2.  | Blue aleurone, BA (NGB20651) | blue        | -                                                                                               |
| 3.  | OWB_DOM                      | black       | +                                                                                               |
| 4.  | OWB_REC                      | white       | -                                                                                               |
| 5.  | OWB_01                       | black       | +                                                                                               |
| 6.  | OWB_02                       | white       | -                                                                                               |
| 7.  | OWB_03                       | white       | +                                                                                               |
| 8.  | OWB_04                       | black       | +                                                                                               |
| 9.  | OWB_05                       | black       | +                                                                                               |
| 10. | OWB_06                       | white       | -                                                                                               |
| 11. | OWB_07                       | black       | +                                                                                               |
| 12. | OWB_08                       | blue        | +                                                                                               |
| 13. | OWB_09                       | white       | -                                                                                               |
| 14. | OWB_10                       | black       | +                                                                                               |
| 15. | OWB_11                       | brown       | +                                                                                               |
| 16. | OWB_13                       | white       | -                                                                                               |
| 17. | OWB_14                       | white       | -                                                                                               |
| 18. | OWB_15                       | brown       | -                                                                                               |
| 19. | OWB_16                       | black       | -                                                                                               |
| 20. | OWB_17                       | brown       | -                                                                                               |
| 21. | OWB_18                       | black       | +                                                                                               |
| 22. | OWB_19                       | black       | -                                                                                               |
| 23. | OWB_20                       | black       | +                                                                                               |
| 24. | OWB_21                       | black       | +                                                                                               |
| 25. | OWB_22                       | white       | -                                                                                               |
| 26. | OWB_23                       | white       | -                                                                                               |
| 27. | OWB_24                       | brown       | -                                                                                               |
| 28. | OWB_26                       | white       | -                                                                                               |
| 29. | OWB_27                       | black       | +                                                                                               |
| 30. | OWB_28                       | white       | +                                                                                               |
| 31. | OWB_29                       | blue        | +                                                                                               |
| 32. | OWB_30                       | brown       | +                                                                                               |
| 33. | OWB_31                       | black       | +                                                                                               |
| 34. | OWB_32                       | brown       | -                                                                                               |
| 35. | OWB_33                       | white       | -                                                                                               |
| 36. | OWB_34                       | white       | -                                                                                               |
| 37. | OWB_35                       | black       | -                                                                                               |

|     |        |       |   |
|-----|--------|-------|---|
| 38. | OWB_36 | black | - |
| 39. | OWB_37 | black | - |
| 40. | OWB_38 | black | + |
| 41. | OWB_39 | brown | + |
| 42. | OWB_40 | brown | - |
| 43. | OWB_41 | black | + |
| 44. | OWB_42 | white | - |
| 45. | OWB_43 | white | - |
| 46. | OWB_44 | blue  | + |
| 47. | OWB_45 | white | - |
| 48. | OWB_46 | white | - |
| 49. | OWB_47 | brown | - |
| 50. | OWB_48 | blue  | + |
| 51. | OWB_49 | blue  | + |
| 52. | OWB_50 | black | - |
| 53. | OWB_51 | brown | - |
| 54. | OWB_52 | white | - |
| 55. | OWB_53 | brown | + |
| 56. | OWB_54 | blue  | + |
| 57. | OWB_55 | brown | + |
| 58. | OWB_56 | blue  | + |
| 59. | OWB_57 | brown | - |
| 60. | OWB_58 | blue  | + |
| 61. | OWB_59 | brown | + |
| 62. | OWB_60 | brown | - |
| 63. | OWB_61 | brown | - |
| 64. | OWB_62 | brown | + |
| 65. | OWB_63 | black | - |
| 66. | OWB_64 | black | - |
| 67. | OWB_65 | black | - |
| 68. | OWB_66 | black | + |
| 69. | OWB_67 | black | - |
| 70. | OWB_68 | black | + |
| 71. | OWB_69 | black | - |
| 72. | OWB_70 | white | - |
| 73. | OWB_71 | brown | - |
| 74. | OWB_72 | blue  | + |
| 75. | OWB_73 | black | - |
| 76. | OWB_74 | brown | - |
| 77. | OWB_75 | black | + |
| 78. | OWB_76 | white | - |
| 79. | OWB_77 | brown | + |
| 80. | OWB_78 | brown | - |
| 81. | OWB_79 | white | - |
| 82. | OWB_80 | brown | + |
| 83. | OWB_81 | black | + |

|      |           |        |   |
|------|-----------|--------|---|
| 84.  | OWB_82    | white  | - |
| 85.  | OWB_83    | brown  | - |
| 86.  | OWB_84    | white  | - |
| 87.  | OWB_85    | blue   | + |
| 88.  | OWB_86    | brown  | + |
| 89.  | OWB_87    | brown  | - |
| 90.  | OWB_88    | brown  | - |
| 91.  | OWB_89    | brown  | + |
| 92.  | OWB_90    | brown  | + |
| 93.  | OWB_91    | purple | + |
| 94.  | OWB_92    | brown  | + |
| 95.  | OWB_93    | blue   | + |
| 96.  | OWB_94    | brown  | - |
| 97.  | HOR 6866  | blue   | + |
| 98.  | HOR17020  | blue   | + |
| 99.  | Biom      | white  | - |
| 100. | Tanay     | white  | - |
| 101. | Vorsinsky | white  | - |
| 102. | Zolotnik  | white  | - |
| 103. | Omskiy-1  | white  | - |
| 104. | Omskiy-2  | white  | - |
| 105. | Acha      | white  | - |
| 106. | Signal    | white  | - |
| 107. | Sobolek   | white  | + |
