# Supplementary material for: Identification and characterization of regulatory network components for anthocyanin synthesis in barley aleurone
Source: PubMed Central journal article supplement (PMC5688479; doi:10.1186/s12870-017-1122-3), 2017-11-14
Supplement: 12870_2017_1122_MOESM2_ESM.pdf [file 12870_2017_1122_MOESM2_ESM.pdf]

Additional file 2. Multiple alignment of the promoter regions of the barley *HvMpc2* gene.

```
1                                                                                               90
HvMpc2-BA ATGTTTGAATATAGTTACATGACACATAATTCCACAACGGGTGGGATGCTCCCTCCATGCTCACACACATCTGGGATGCCCC-----
HvMpc2-BW ATGTTTGAATATAGTTACATGACACATAATTCCACAACGGGTGGGATGCTCCCTCCATGCTCACACACATCTGGGATGCCCCCCTTCGGT
HvMpc2-DOM ATGTTTGAATATAGTTACATGACACATAATTCCACAACGGGTGGGATGCTCCCTCCATGCTCACACACATCTGGGATGCCCCCCTTCGGT
HvMpc2-REC ATGTTTGAATATAGTTACATGACACATAATTCCACAACGGGTGGGATGCTCCCTCCATGCTCACACACATCTGGGATGCCCCCCTTCGGT

91                                                                                               180
HvMpc2-BA -----GGTCCG-----TGGTGACACAGGTGAGCCGTCGAGCAAAGCTACGTGCTCTGGCTTCTTTGGACTCAAAGGGCAACGA
HvMpc2-BW TTTGGGGGGTCCGGGTGCCTCGTGCTGACACAGGTGAGCCGTCGAGCAAAGCTACGTGCTCTGGCTTCTTTGGACTCAAAGGGCAACGA
HvMpc2-DOM TTTGGGGGGTCCGGGTGCCTCGTGCTGACACAGGTGAGCCGTCGAGCAAAGCTACGTGCTCTGGCTTCTTTGGACTCAAAGGGCAACGA
HvMpc2-REC TTTGGGGGGTCCGGGTGCCTCGTGCTGACACAGGTGAGCCGTCGAGCAAAGCTACGTGCTCTGGCTTCTTTGGACTCAAAGGGCAACGA

181                                                                                               270
HvMpc2-BA TCCTTTTCAGTTGTCAAAGAAATATGACATAGTACATCTCACCTGCCGCGATCTTGGACGGCGAAGAAATGGCCGCGCTGTTTCATTGG
HvMpc2-BW TCCTTTTCAGTTGTCAAAGAAATACGACATAGTACATCTCACCTGCCGCGATCTTGGACGGCGAAGAAATGGCCGCGCTGTTTCATTGG
HvMpc2-DOM TCCTTTTCAGTTGTCAAAGAAATACGACATAGTACATCTCACCTGCCGCGATCTTGGACGGCGAAGAAATGGCCGCGCTGTTTCATTGG
HvMpc2-REC TCCTTTTCAGTTGTCAAAGAAATACGACATAGTACATCTCACCTGCCGCGATCTTGGACGGCGAAGAAATGGCCGCGCTGTTTCATTGG

271                                                                                               360
HvMpc2-BA ACAAATGGAGCCTTCCTAGCCTTTTGGTCCATCTAACTCTGAGATAAGTGTGCGCTCACGATGACTGTGGATTGAAGGTGCAAAGCAGGTC
HvMpc2-BW ACAAATGGAGCCTTCCTAGCCTTTTGGTCCATCTAACTCTGAGATAAGTGTGCGCTCACGATGACTGTGGATTGAAGGTGCAAAGCAGGTC
HvMpc2-DOM ACAAATGGAGCCTTCCTAGCCTTTTGGTCCATCTAACTCTGAGATAAGTGTGCGCTCACGATGACTGTGGATTGAAGGTGCAAAGCAGGTC
HvMpc2-REC ACAAATGGAGTCTTCCTAGCCTTTTGGTCCATCTAACTCTGAGATAAGTGTGCGCTCACGATGACTGTGGATTGAAGGTGCAAAGCAGGTC

361                                                                                               450
HvMpc2-BA CACGTAGACGCGCTACTGTACAATGCTAAACGGGTCCACGTGGACGCGCTGATGACTAAATACAG-AACAACCCTGCTGCCCAAAGATGA
HvMpc2-BW CACGTAGACGCGCTATTGTACAATGCTAAACGGGTCCACGTAGACGCGCTAATGACTAAATACGGCAACAACCCTGCTGCCCAAAGATGA
HvMpc2-DOM CACGTAGACGCGCTATTGTACAATGCTAAACGGGTCCACGTAGACGCGCTAATGACTAAATACGGCAACAACCCTGCTGCCCAAAGATGA
HvMpc2-REC CACGTAGACGCGCTATTGTACAATGCTAAACGGGTCCACGTAGACGCGCTAATGACTAAATACGGCAACAACCCTGCTGCCCAAAGATGA

451                                                                                               522
HvMpc2-BA CGGACCCTCACTCTCTCGCTCTCTAACACAACACAACACACACCCGGAGAAGAGCGATAGAGAGAAGGAGAGA
HvMpc2-BW CGGACCCTCACTCTCTCGCTCTCTAACACAACACAACACACACCCGGAGAAGAG--ATAGAGAGAAGGAGAGA
HvMpc2-DOM CGGACCCTCACTCTCTCGCTCTCTAACACAACACAACACACACCCGGAGAAGAG--ATAGAGAGAAGGAGAGA
HvMpc2-REC CGGACCCTCACTCTCTCGCTCTCTAACACAACACAACACACACCCGGAGAAGAG--ATAGAGAGAAGGAGAGA
```
