# Supplementary material for: Identification and characterization of regulatory network components for anthocyanin synthesis in barley aleurone
Source: PubMed Central journal article supplement (PMC5688479; doi:10.1186/s12870-017-1122-3), 2017-11-14

**Additional file 3.** The results of genotyping of the mapping population (Oregon Wolfe Barleys, OWB) for molecular mapping of barley genes: A – *HvMyc2* B – *HvMpc2* C – *HvF3'5'H*. Amplified fragments of the mapping population individuals were digested with restriction endonucleases *Bse1* I, *Hga* I and *EcoR* I respectively (CAPS-analysis). DOM and REC are the parental lines.

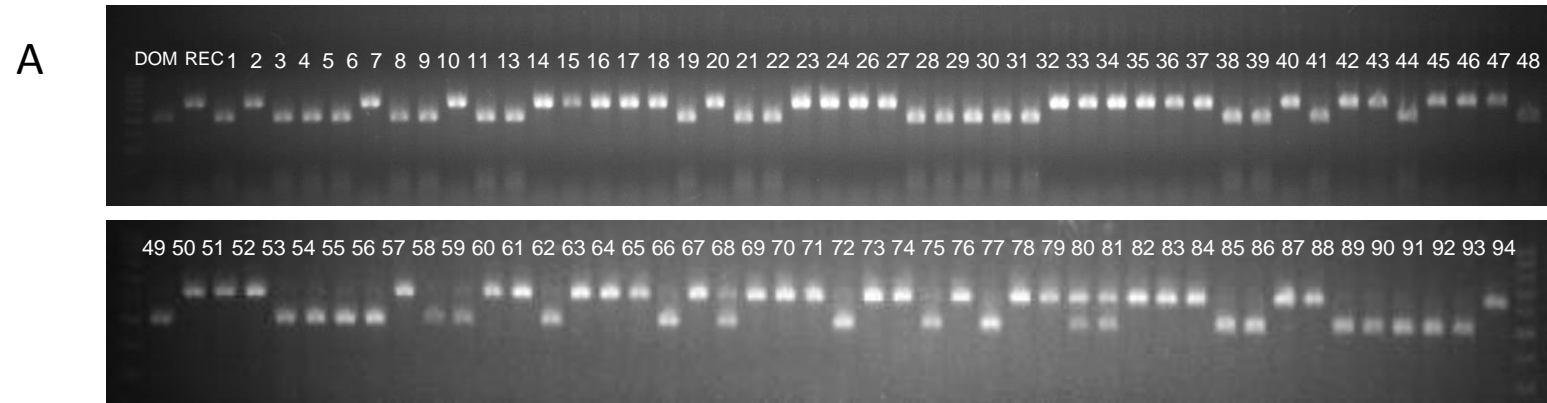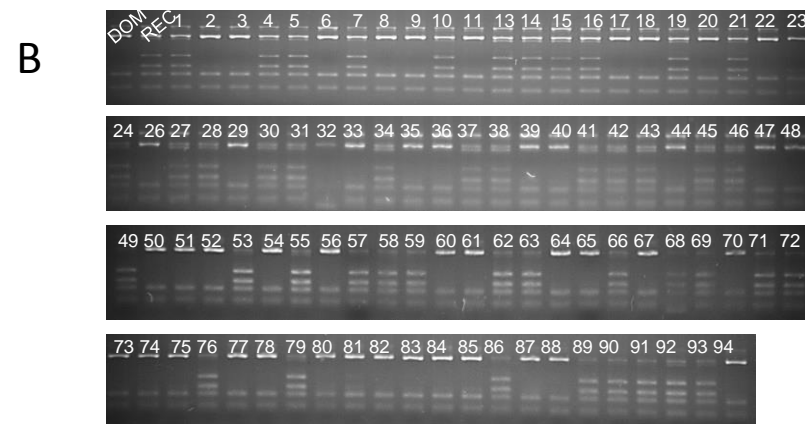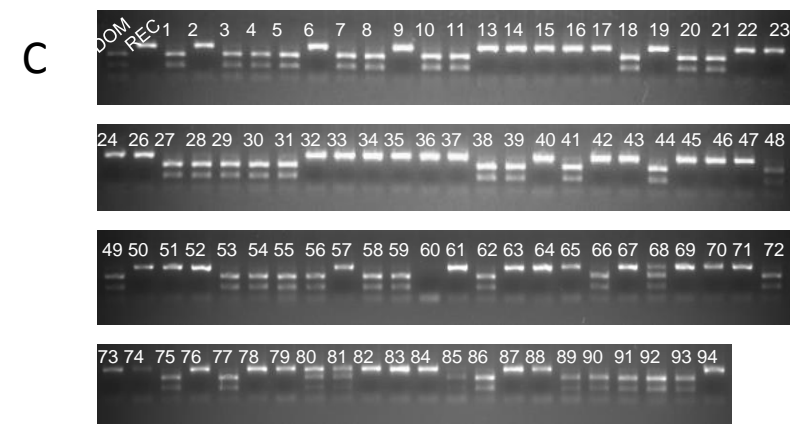

Supplement: 12870_2017_1122_MOESM3_ESM.pdf [file 12870_2017_1122_MOESM3_ESM.pdf]
